1 **The unique tropism of *Mycobacterium leprae* to the nasal epithelial cells can be explained**  
2 **by the mammalian cell entry protein 1A**

3

4 **Viesta Beby Fadlitha<sup>1</sup>, Fuki Yamamoto<sup>1</sup>, Irfan Idris<sup>2</sup>, Haslindah Dahlan<sup>2</sup>, Naoya Sato<sup>3,4</sup>,**  
5 **Vienza Beby Aftitah<sup>5</sup>, Andini Febriyanda<sup>2</sup>, Takao Fujimura<sup>4\*</sup>, Hiroaki Takimoto<sup>6</sup>**

6

7 **<sup>1</sup>Department of Dermatology, Kitasato University Graduate School of Medical Science,**  
8 **Sagamihara, Kanagawa, Japan**

9 **<sup>2</sup>Hasanuddin University Medical Research Centre, Makassar, South Sulawesi, Indonesia**

10 **<sup>3</sup>Departement of Dermatology, Toshiba Rinkan Hospital, Sagamihara, Kanagawa, Japan**

11 **<sup>4</sup>Department of Dermatology, Kitasato University School of Medicine, Sagamihara,**  
12 **Kanagawa, Japan**

13 **<sup>5</sup>Department of Cellular Immunology, Kitasato University Graduate School of Medical**  
14 **Science, Sagamihara, Kanagawa, Japan.**

15 **<sup>6</sup>Department of Bioscience, Kitasato University School of Science, Sagamihara,**  
16 **Kanagawa, Japan**

17

18 **\*Corresponding author**

19 **E-mail: [fujimura@med.kitasato-u.ac.jp](mailto:fujimura@med.kitasato-u.ac.jp) (TF)**

20

21 **Short title: Nasal epithelial cell invasion of *Mycobaterium leprae***

22

23

24

## 25 Abstract

26 Leprosy is a chronic infection where the skin and peripheral nervous system is invaded  
27 by *Mycobacterium leprae*. The infection mechanism remains unknown in part because  
28 culture methods have not been established yet for *M.leprae*.

29 Mce1A protein (442 aa) is coded by mce1A (1326 bp) of *M.leprae*. The mce1A homolog  
30 in *Mycobacterium tuberculosis* is known to be associated with *M.tuberculosis* epithelial cell  
31 entry, and survival and multiplication within macrophages. Studies using recombinant  
32 proteins have indicated that mce1A of *M.leprae* is also associated with epithelial cell entry.  
33 This study is aimed at identifying particular sequences within mce1A associated with  
34 *M.leprae* epithelial cell entry.

35 Recombinant proteins having N-terminus and C-terminus truncations of the mce1A  
36 region of *M.leprae* were created in *Eschericia coli*. Entry activity of latex beads, coated with  
37 these truncated proteins (r-lep37kDa and r-lep27kDa), into HeLa cells was observed by  
38 electron microscopy. The entry activity was preserved even when 315 bp (105 aa) and 922  
39 bp (308 aa) was truncated from the N-terminus and C-terminus, respectively. This 316 – 921  
40 bp region was divided into three sub-regions: 316 – 531 bp (InvX), 532 – 753 bp (InvY), and  
41 754 – 921 bp (InvZ). Each sub-region was cloned into an AIDA vector and expressed on the  
42 surface of *E.coli*. Entry of these *E.coli* into monolayer-cultured HeLa and RPMI2650 cells  
43 was observed by electron microscopy. Only *E.coli* harboring the InvX sub-region exhibited  
44 cell entry. InvX was further divided into 4 domains, InvXa - InvXd, containing sequences 1  
45 – 24 aa, 25 – 46 aa, 47 – 57 aa, and 58 – 72 aa, respectively.

46 Recombinant *E.coli*, expressing each of InvXa - InvXd on the surface, were treated with  
47 antibodies against these domains, then added to monolayer cultured RPMI cells. The  
48 effectiveness of these antibodies in preventing cell entry was studied by colony counting.  
49 Entry activity was suppressed by antibodies against InvXa, InvXb, and InvXd. This suggests

50 that these three InvX domains of mce1A are important for *M.leprae* invasion into nasal  
51 epithelial cells.

## 52 **Author Summary**

53 Mce1A protein is encoded by the mce1A region of mce1 locus of *M.tuberculosis* and  
54 *M.leprae*, and is involved in the bacteria's invasion into epithelial cells. The present study  
55 revealed that the active sequence of *M.leprae* involved in the invasion into nasal mucosa  
56 epithelial cells is present in the 316-531 bp region of mce1A.

57 The most important region of mce1A protein involved in the invasion of *M.tuberculosis*  
58 into human epithelial cells is called the InvIII region, which is located between amino acids  
59 at position 130 to 152. The InvIII region of *M.tuberculosis* corresponds to InvXb of *M.leprae*.  
60 The sequences of these regions are identical between amino acids at positions 10 to position  
61 22 as counted from the N terminus, except that amino acids at positions 1 to 3, 5, 8, 9, 13 are  
62 different between *M.leprae* and *M.tuberculosis*. Suppression test results also indicated that the  
63 most important region of mce1A protein of *M.leprae* involved in the invasion into human  
64 epithelial cells is different from that *M.tuberculosis*. While *M.tuberculosis* has 3,959 protein-  
65 encoding genes and only 6 pseudogenes, *M.leprae* has only 1,604 protein-encoding genes but  
66 has 1,116 pseudogenes indicating that in *M.leprae*, far more proteins are inactivated as  
67 compared to *M.tuberculosis*. The present study also revealed that, as in *M.tuberculosis*, the  
68 mce1A protein is expressed on the surface of bacteria as a native protein. In light of these data,  
69 the mce1A protein is considered to be one of the most important proteins involved in the  
70 invasion of *M.leprae* into nasal mucosa epithelial cells.

## 71 **Introduction**

72 Hansen's disease is a chronic infection with acid fast bacillus where skin and peripheral  
73 nerves are damaged by the infection with *Mycobacterium leprae* (*M.leprae*). Although the

74 number of Hansen's disease cases has drastically decreased in developed countries, worldwide,  
75 the number of new cases of Hansen's disease has only dipped below 200,000 per year.  
76 Hansen's disease is one of the Neglected Tropical Disease (NTDs) and is still a major problem  
77 against public health[1].

78 Hansen's disease can be broadly divided into tuberculoid leprosy (T type) and lepromatous  
79 leprosy (L type), depending on the host immune response to *M.leprae*[2]. Tuberculoid leprosy  
80 triggers predominantly cellular immunity response, and is also called paucibacillary, because  
81 very few are detected at the focus of infection or nasal mucosal membrane. On the other hand,  
82 lepromatous leprosy triggers predominantly humoral immunity, and is also called  
83 multibacillary, because it is detected in a large amount at the focus of infection and, in  
84 particular, from nasal mucosal membrane. Nasal discharge from lepromatous leprosy patients,  
85 therefore, is considered as the main source of the infection[3]. Infection of Hansen's disease  
86 has conventionally been considered to occur through close skin contact or through wounds, but  
87 recently another infection mode, in which *M.leprae* in the aerosol from nasal discharge of  
88 lepromatous leprosy patients invades into the upper respiratory tract and nasal mucosal  
89 membrane to cause infection, has come to be recognized[3-10]. However, the invasion  
90 mechanism in this infection mode has not been extensively studied yet.

91 *M.leprae* cannot be artificially cultured. One possible reason for this is the presence of a  
92 large number of pseudogenes. *M.leprae* has various enzyme-coding genes that are replaced  
93 with pseudogenes, and therefore has only a minimum metabolic activity and multiplies in  
94 macrophages and Schwann cells. Invasion mechanism of *M.leprae* into Schwann cells have been  
95 studied by Rambukkana, et al., in details. The study revealed that laminin-2 present in the basal  
96 lamina surrounding Schwann cells serves as a receptor, and histone-like protein Hlp/LBP  
97 expressed on the surface of the bacteria binds to phenolic glycolipid PGL-1, making the entry  
98 into the cell possible[11-14].

99 To infect Schwann cells, *M.leprae* has to invade the epidermal cells first. The mechanism  
100 of *M.leprae* invasion into the epidermal cells, however, has not been elucidated yet. Meanwhile,  
101 gene regions involved in the invasion of *Mycobacterium tuberculosis* (*M.tuberculosis*) into  
102 epidermal cells are already known[15,16]. Casali et al. reported that, using adhesin involved in  
103 diffuse adherence (AIDA) method, the region coded for by 316 - 531 bp of *M.tuberculosis*  
104 mce1A region (Rv 0169; 198534 - 199898 bp, 1365 bp) is expressed on the surface of *E.coli*  
105 as a polypeptide chain, thereby imparting the *E.coli* with the ability to invade HeLa cells, that  
106 the invasion activity is inhibited by the monoclonal antibody that recognizes the continuous  
107 peptide of InvIII region (388 – 453 bp)[17,18]. It became clear that *M.leprae* includes a region  
108 (ML2589, 1326 bp) highly homologous to mce1A protein of *M.tuberculosis*. Sato et al.  
109 reported that a recombinant protein, a 37 kDa protein encoded by 73 - 921 bp, which is the  
110 mce1A region excluding the signal sequence, was found to have an invasion activity into  
111 epidermal cells[19]. However, the active sequence involved in the invasion by *M.leprae* into  
112 epidermal cells has not been identified. The present study was conducted to identify the active  
113 sequence in the mce1A region. In this study, the N-terminus and C-terminus truncated proteins  
114 expressed on the *E.coli*, where *E.coli* with specific regions are expressed thereon by the AIDA  
115 method, and hyperimmune antisera against the invasion region are used to investigate the  
116 invasion activity into epidermal cells.

## 117 **Material and methods**

### 118 **Bacterial strains and plasmid**

119 The genomic DNA used in the study was isolated from *M.leprae* strain Thai 53, which  
120 was maintained at Leprosy Research Centre, National Institute of Infectious Diseases, Japan,  
121 as previously described[20,21]. The pQE30 plasmid and *E.coli* M15 (pREP4) were purchased

122 from Qiagen (Valencia, CA). The pQE30 plasmid was used as expression vector. *E.coli* M15  
123 (pREP4) was used as a host for the vector, as recommended by the manufacturer.

124 The pMK90 plasmid and *E.coli* UT4400 were obtained from Dr. Riley (University of  
125 California at Berkeley, California, USA).

## 126 **Construction of vector**

127 In Sanger Center *M. leprae* strain TN complete genome sequence, *mce1A* gene is a 1326  
128 bp putative ORF located between positions 3092446 and 3093771 (NCBI-GeneID: 910890).  
129 The *mce1A* DNA sequence of strain Thai 53 was identical to that of strain TN. It was subcloned  
130 into pQE30 vector in a truncated reading frame. The 603 bp ORF deleted at 5' and 3' ends of  
131 *mce1A* gene is located between positions 316 and 921 (Fig 1). This sequence was amplified  
132 by polymerase chain reaction (PCR) directly from the genomic DNA of *M. leprae* strain Thai  
133 53 with oligonucleotide primers designed to introduce SacI and HindIII endonuclease  
134 restriction sites at the ends. The amplified products were ligated into the pQE30 vector  
135 linearized with SacI and HindIII. The use of pQE30 vector allowed the plasmid to express the  
136 *mce1A* product with a polyhistidine (6 x His) tag at the N-terminus (r-*mce1A*p). The resultant  
137 plasmid was cloned into *E.coli* M15 (pREP4) by electroporation (Gene Pulser II, Bio-Rad,  
138 Hercules, CA), according to the manufacturer's instructions.

139

140 **Fig 1. r-*mce1A* truncated protein regions expressed on *E.coli*, regions externally**  
141 **expressed using AIDA method, and regions for which hyperimmune antisera is prepared.**

142 Using r-lep45kDa protein encoded in the entire region of *mce1A* minus signal sequences (73  
143 – 1326 bp) as a reference, the protein with its C terminus truncated to 921 bp was labeled as r-  
144 lep37kDa protein, and the protein with its N terminus truncated to 315 bp was labeled as r-  
145 lep27kDa protein. Furthermore, 316 – 921 bp region was divided into 316 – 531 bp, 532 – 753  
146 bp, and 754 – 921 bp, and recombinant *E.coli* in which these regions are externally expressed

147 using AIDA method were prepared. InvX region (316 – 531 bp) was further divided into InvXa  
148 (316 – 387 bp), InvXb (388 – 453 bp), InvXc (454 – 486 bp), InvXd (487 – 531 bp), and  
149 hyperimmune antisera for each region was prepared.

150

151 Plasmid pMK90 is an ampicillin-resistant pBR322 derivative that expresses a  
152 recombinant AIDA protein under the control of its own promoter[22]. The AIDA coding  
153 sequence has been altered to remove the native passenger; it consists of a 49-amino-acid signal  
154 peptide. A 78-amino-acid linker region incorporating a multiple cloning site, and the entire  
155 440-amino-acid barrel core. A 216 bp DNA fragment encoding InvX (*M.leprae* positions  
156 3092761 – 3092976 bp), 222 bp DNA fragment encoding InvY (*M.leprae* positions 3092977  
157 – 3093198 bp), 168 bp DNA fragment encoding InvZ (*M.leprae* positions 3093199 – 3093366  
158 bp) was amplified by PCR from a plasmid containing *mce1A* and cloned into pMK90,  
159 generating pMK100. The correct insert was confirmed by sequencing. The amino acid  
160 sequence of InvX is  
161 VNADIKATTVGGKYVSLTTPPEHPSQKRLTPQTVIDARSVTTEINTLFLQITLIEKVD  
162 PIKLNLTLSAAAQ (316 – 531 bp), the amino acid sequence of InvY is  
163 SLAGLGERFGQSIVNGNSVLDDVNSQLPQARHDIQQLASLGDTYANSASDFFDFLNN  
164 SIVTSRTI (532 – 753 bp), and the amino acid sequence of InvZ is  
165 VLLAAVGFNTGADIFSRSGPYLARGAADLVPTAQLLDTYSPAIFCTLRNYHDIEP  
166 (754 – 921 bp) (Fig 1).

## 167 **Protein expression and purification**

168 Recombinant protein was expressed and purified according to manufacturer's instruction.  
169 Briefly, *E.coli* M15 [pREP4] containing pQE30/*mce1A* plasmid was grown overnight in 10-  
170 ml superbrotth containing 100 µg/ml ampicillin and 50 µg/ml kanamycin. A 500 µl aliquot of  
171 bacterial suspension was pelleted, resuspended in 30 ml of superbrotth and incubated at 37°C

172 for 1 – 2 h until  $OD_{600} = 0.6$ . Then isopropyl  $\beta$ -D-thiogalactoside was added to final  
173 concentration 1 mM and incubated for 3 h at 37°C. The induced and uninduced *r-E.coli* strains  
174 were analyzed by SDS-polyacrylamide gel electrophoresis (SDS-PAGE). The newly expressed  
175 protein formed an inclusion body in the *r-E.coli* host. The inclusion body was therefore purified  
176 under denaturing conditions according to the instructions of the expression vector's respective  
177 manufactures. The 6 x His tag *mce1A* solubilized with lysis buffer (6 M Guanidine, 10 mM  
178 Tris—HCl, 100 mM  $NaH_2PO_4$ , pH 8.0) was bound to a Ni—NTA resin column equilibrated  
179 with lysis buffer, and was eluted by elution buffer (6 M Guanidine, 10 mM Tris—HCl, 100  
180 mM  $NaH_2PO_4$ , 20—250 mM imidazole, pH 6.3). The eluted protein were subsequently  
181 refolded with 1 mM dithiothreitol (Sigma, St. Louis, MO, USA) and 0.1 mM  
182 phenylmethylsulfonyl fluoride (Sigma) by dialysis, gradually removing guanidine. The *r-*  
183 *mce1A* was finally purified and refolded as a soluble protein. The protein was separated by  
184 SDS-PAGE and was analyzed for purity by Coomassie brilliant blue R-250 staining.

## 185 **Immunoelectron microscopy**

186 The antibody against the *mce1A* protein was prepared in Balb/c mice (a 45 kDa  
187 recombinant *mce1A* protein prepared previously using *E.coli* was used as the immunogen).  
188 The r-45kDa-*mce1A* protein was used for antibody production because it was most abundantly  
189 expressed in the *E.coli* host that we used. The r-45kDa-*mce1A* protein was mixed with Titer  
190 Max Gold (AdipoGen Life Sciences, Liestal, Switzerland) of the same amount. Approximately  
191 100  $\mu$ g of the protein was administered subcutaneously at five sites in four 7-weeks-old Balb/c  
192 mice, followed by two booster injections of 100  $\mu$ g each 2 and 4 weeks after the first injection.  
193 Blood was harvested 2 weeks after the last booster dose.

194 The antiserum was used in the colloidal gold immunoelectron microscopy. A bacterial  
195 pellet (containing  $\approx 10^7$  organisms) of *M.leprae* strain Thai 53 that that had been multiplied in  
196 footpads of athymic nude mice, was fixed in 3% glutaraldehyde in phosphate buffer saline



197 (PBS) pH 7.6 for 24 h, washed five times in PBS and then exposed at 4°C for 16 h to a 1:1000  
198 dilution of the mice antibody raised against mce1A. The suspension was then washed and  
199 incubated at 4°C for 16 h with colloidal gold suspension containing 5 nm gold particles ( $1.9 \times$   
200  $10^{13}$  particles ml<sup>-1</sup>) conjugated to anti-mice IgG goat antibody (Amersham/GE Health Care  
201 Life Science, Tokyo, Japan). The cells were washed again five times in PBS, stained with 0.1%  
202 uranyl acetate in water and examined with a HITACHI model H-15 electron microscope.

## 203 **Cell Culture**

204 HeLa cells and RPMI2650 cells were purchased from America Type Culture Collection  
205 (ATCC, Manassas, VA). HeLa cells (ATCC CCL-2) were maintained with Dulbecco's  
206 modified Eagle's media (DMEM; Invitrogen, Carlsbad, CA) supplemented with 50 µg/ml  
207 gentamicin (GM) and 10% fetal bovine serum (FBS) (JRH Bioscience, Lenexa, KS).  
208 RPMI2650 human epithelial nasal septal cell line (ATCC CCL30) was grown in Eagle's  
209 minimum essential medium (EMEM; Invitrogen, Carlsbad, CA) supplemented with 50 µg/ml  
210 GM and 10% FBS. Cells were maintained in culture and for the assay, were detached from the  
211 plastic by using 0.25% Trypsin-EDTA (1x) with phenol red (Gibco, Grand Island, NY, USA)  
212 at 37°C. The cells were then centrifuged at  $280 \times g$  for 7 min at 4°C, counted in Neubauer  
213 hemocytometer, and plated into tissue culture well or flask at 37°C in a 5% CO<sub>2</sub> atmosphere.

## 214 **Cell uptake assay of protein-coated latex beads by electron** 215 **microscopy**

216 A 30 µ of stock suspensions of 1.1 µm diameter polystyrene latex beads, containing  $5 \times$   
217  $10^8$  beads/ml (Sigma), were mixed in 150 µl of PBS containing 50 µg/ml of each set of protein  
218 and incubated for 16 h at 37°C. After incubation, the samples were centrifuged at  $7000 \times g$  and  
219 resuspended in 750 µl of PBS. A 500-µl sample of this suspension was added to a near-  
220 confluent cultured cell monolayer grown in a 25-cm<sup>2</sup> flask containing 7 ml of appropriate media

221 for cultured cells. The cells were incubated for 5 h at 37°C in a CO<sub>2</sub> incubator, washed four  
222 times with PBS and one time with 0.1 M cacodylate phosphate buffer (pH 7.6), and then  
223 collected with cell-scraper (Becton Dickinson, Japan). The collected cells were fixed with 2%  
224 glutaraldehyde in 0.1 M cacodylate phosphate buffer (pH 7.6) at 4°C overnight, post-fixed with  
225 1% osmium tetroxide in PBS, dehydrated through graded ethanol solutions and embedded in  
226 Spurr's low-viscosity embedding media. The ultrathin sections were stained with uranyl acetate  
227 and lead citrate and examined with a JEM-1200EX (JEOL, Tokyo, Japan) transmission  
228 electron microscope. Coated beads with bovine serum albumin (BSA) fraction V (Boehringer  
229 Mannheim, GmbH, Germany) were used as negative controls.

## 230 **Immunofluorescence microscopy**

231 *E.coli* cells were fixed onto microscope slides with 0.4% paraformaldehyde for 10 min at  
232 room temperature, and non-specific binding was blocked by incubation in 1% (wt/vol) BSA  
233 for 30 min. Slides were incubated for 1 h with a 1:200 dilution of a rabbit antibody raised  
234 against InvXa, InvXb, InvXc, and InvXd washed, and incubated with 1:1000 dilution of  
235 fluorescein isothiocyanate-labeled anti-rabbit antibody (Abcam Plc, Cambridge, UK) for 30  
236 min. After extensive washing, the coverslips were mounted. Slides were viewed on an Olympus  
237 BX51 inverted microscope with an epifluorescence attachment.

## 238 **Invasion assay**

### 239 **InvX, InvY, InvZ mediated invasion of *E.coli* into the nasal epithelial cells** 240 **by electron microscopy**

241 The culture medium of a monolayer culture of  $1.15 \times 10^6$  HeLa cells and  $3 \times 10^7$  RPMI2650  
242 cells, was replaced with a culture medium that does not contain antibiotic substances. Then  
243 *E.coli* externally expressing by AIDA (UT4400/lep316, UT4400/lep532, UT4400/lep754) was  
244 added at a bacteria to cells ratio of 100:1, and incubated in a CO<sub>2</sub> incubator at 37°C, for 9 h for

245 HeLa cells and 6 h for RPMI2650 cells. After culturing, the cell surface was washed with PBS,  
246 and then harvested using a cell scraper.

247 Infected cells were prepared for examination by transmission electron microscopy as  
248 previously described<sup>[16]</sup>. Briefly, cells were fixed in 2% glutaraldehyde and stained with  
249 osmium tetroxide solution before dehydration through graded ethanol solutions. Cells were  
250 embedded in Spurr's low-viscosity embedding medium, ultrathin sections were stained with  
251 uranyl acetate and lead citrate. Samples were examined with a JEM-1230 (JEOL) transmission  
252 electron microscope.

### 253 **Gentamicin protection assays**

254 Gentamicin protection assays were performed according to the method of Elsinghorst[23].  
255 RPMI2650 cells were seeded at  $5 \times 10^5$  cells per well directly into 24-well plates and cultured  
256 for 24 h until confluent. Cell culture medium was modified to contain no antibiotics.  
257 Recombinant *E.coli* cells were added to the monolayer at a multiplicity of infection (MOI) of  
258 10:1 and incubated at 37°C for 3 h. To enumerate intracellular bacteria, the monolayer was  
259 washed five times with PBS and incubated with medium containing 100µg of GM (Sigma) per  
260 ml for 2 h to kill extracellular bacteria and permit the enumeration of intracellular bacteria. The  
261 monolayer was again washed five times with PBS and lysed with 0.1% Triton X-100 (Eastman  
262 Kodak, Rochester, NY). Serial dilutions of released bacteria were plated for counting. Results  
263 shown are the mean values for an experiment performed in triplicate. Each experiment was  
264 performed three times using independent cultures, with similar result.

### 265 **Inhibition Assay**

266 InvXa, InvXb, InvXc, and InvXd antibodies were added in the amount of 1/200 (200 µg)  
267 to *E.coli* that externally express UT4400/lep316 by AIDA adjusted to  $1 \times 10^8$  CFU/ml. This  
268 was allowed to react on a rotating platform at 4°C overnight to make antibody-treated bacteria.

269 *E.coli* externally expressing proteins by AIDA were allowed to react with IgG from healthy,  
270 control rabbits in a similar manner as the control, where this was used as the bacteria untreated  
271 by antibody. After the medium for RPMI2650 cells, which were monolayer-cultured in a 24-  
272 well plates,  $5 \times 10^5$  cells/well, was replaced with a medium not containing antibiotic agent, the  
273 antibody-treated bacteria and untreated bacteria were added at a bacteria to cells ratio of 30:1.  
274 After culturing in CO<sub>2</sub> incubator at 37°C for 3 h, the surface of the cells were washed with PBS  
275 five times, and the medium was replaced with a 100 µg/ml GM-appended DME medium to kill  
276 the bacteria outside the cells, followed by additional incubation for 2 h. The surface of cells  
277 was washed with PBS, and then 0.1% Triton X-100-added PBS was added in the amount of 1  
278 ml/well to break the cells and the bacteria inside the cells were harvested. The harvested  
279 bacteria suspension liquid was serially diluted 10 times with PBS, and then was applied to  
280 Heart Infusion agar medium (Nissui, Tokyo, Japan). This was left overnight at 37°C, and then  
281 the colonies were counted to determine the number of bacteria entered into the cells. The  
282 cultured cells were prepared in the amount of 3 wells each, and the average of each well and  
283 standard deviation were calculated and the result was presented on a graph.

## 284 **Ethics statement**

285 This study was approved by the Institutional Animal Care and Use Committee (Permission  
286 number: 2013153) and carried out in accordance with the KITASATO University Animal  
287 Experimentation Regulations.

## 288 **Result**

### 289 **Immunoelectron microscopy of *M.leprae***

290 Immunoelectron microscopy was employed to determine whether recombinant *E.coli*  
291 expressed the mce1A protein on the cell surface.

292 The bacilli expressing mce1A protein were pretreated with an antibody (Ab) raised against  
293 r-45 kDa mce1A protein, and were followed by incubation with anti-IgG Ab-conjugated  
294 colloidal gold particles (Fig 2). The immunoelectron microscopic study revealed that the native  
295 mce1A protein is expressed on the surface of bacilli. This confirms that the recombinant *E.coli*  
296 not only expresses mce1, but the mce1 is transported to the cell surface and sufficiently  
297 presented such that it can bind the antibody against it.

298

299 **Fig 2. Colloidal gold immunoelectron microscopic analysis of *M.leprae* strain Thai 53.** The  
300 bacilli were pretreated with an antibody (Ab) raised against r-45 kDa mce1A protein, and were  
301 followed by incubation with anti-IgG Ab-conjugated colloidal gold particles. Gold particles  
302 are shown decorating the surface of the *M.leprae* bacillus (arrowheads).

303

### 304 **HeLa cell uptake assay of protein-coated polystyrene latex** 305 **microbeads by electron microscopy**

306 The active sequence involved in the invasion into the epithelial cells was investigated in  
307 the following manner. The r-lep37kDa protein, which had been prepared in the previous  
308 experiment using r-lep45kDa protein as the reference by truncating the C terminus to 308 aa  
309 (922 bp), was further truncated to 105 aa (315 bp) from N terminus to provide r-lep27kDa  
310 protein where the proteins using were expressed using an *E.coli* expression system (Fig 1).  
311 Each of the truncated protein was observed for invasion activity into HeLa cells using an  
312 electron microscope. In this observation, images of beads coated with r-lep37kDa protein and  
313 beads coated with r-lep27kDa protein invading into the cytoplasm of HeLa cells were captured,  
314 but BSA-coated beads, which are the negative control, were not found to invade the cytoplasm  
315 (Fig 3). This result suggest that the active sequence is present between 316 – 921 bp, which  
316 encodes r-lep27kDa protein.

317

318 **Fig 3. HeLa cells uptake assay of protein-coated polystyrene latex microbeads by electron**  
319 **microscopy.** Monolayer-cultured HeLa cells and the truncated protein-coated beads and BSA-  
320 coated beads were allowed to react for 5 h, and the entry of beads into HeLa cells were observed  
321 under an electron microscope. As shown in the arrow, (A) r-lep37kDa protein-coated beads  
322 and (B) r-lep27kDa protein-coated beads were observed to enter into HeLa cells, but (C) BSA-  
323 coated beads were not observed to enter into HeLa cells. Magnification  $\times 3500$  (A),  $\times 5000$   
324 (B,C)

325

326 **InvX, InvY, InvZ mediated invasion of *E.coli* into the nasal**  
327 **epithelial cells by electron microscopy**

328 The active sequence was further investigated. The 316 – 921 bp region was divided into  
329 InvX; 316 – 531 bp, InvY: 532 – 753 bp, InvZ: 754 – 921 bp, and each of the regions was  
330 incorporated into AIDA vector to produce a recombinant *E.coli* externally expressing the  
331 proteins (Fig 1). The *E.coli* externally expressing the proteins by the AIDA method were  
332 observed for invasion activity into HeLa cells and RPMI2650 cells under the electron  
333 microscope. *E.coli* expressing InvX (UT4400/lep316) was found in abundance in the  
334 cytoplasm. *E.coli* expressing InvY and InvZ (UT4400/lep532 and UT4400/lep754) and  
335 UT4400 were observed present around the cells but not inside the cytoplasm (Fig 4). These  
336 results suggest that the active sequence is present in 316 – 531 bp (InvX).

337

338 **Fig 4. Transmission electron microscopy of InvX, InvY, InvZ mediated invasion of *E.coli***  
339 **into HeLa and nasal epithelial cells.** UT4400 (A,E), UT4400/lep316 (B,F), UT4400/lep532  
340 (C,G), and UT4400/lep754 (D,H) were added to monolayer cultured HeLa cells (1) and to  
341 RPMI2650 cells (2) at a cell to bacteria ratio of 1:100. They were allowed to react for 9 h and

342 6 h, respectively, and *E.coli* entry into the cells was observed under an electron microscope.  
343 Only UT4400/lep316 (B,F) was observed to invade HeLa cells and RPMI2650 cells. Although  
344 UT4400 (A,E), UT4400/lep532 (C,G) and UT4400/lep754 (D,H) were observed to be present  
345 around the cells, no invasion into the cells was observed with them. Magnification  $\times 5000$

### 346 **InvX, InvY, InvZ mediated invasion of *E.coli* into the nasal** 347 **epithelial cells (gentamicin protection assay)**

348 Next, using a gentamicin protection assay, the number of bacteria which entered into  
349 RPMI2650 cells was determined in colony forming units (CFU).

350 To determine uptake of the host *E.coli* cells using a gentamicin protection assay, we  
351 assessed the invasive ability of InvX, InvY, InvZ expressing *E.coli* (pMK100) cells showed  
352 invasion levels at the 3 h time point.

353 In RPMI2650 cells, invasive activity of InvX-expressing *E.coli* was significantly higher  
354 than that of InvY, InvZ, and negative control (Fig 5). The result was similar to the observations  
355 by electron microscopy. Invasion activity into nasal mucosa epithelial cells was successfully  
356 imparted to a pathogenic *E.coli* by externally expressing the InvX region of *M.leprae* on the  
357 *E.coli*. The InvX mediates the nasal epithelial cells invasion by non-pathogenic *E.coli*. The  
358 InvX region within mce1A protein is then sufficient for the invasion of *E.coli* into the cells.

359

360 **Fig 5. InvX, InvY, InvZ mediated invasion by *E.coli* into the nasal epithelial cells**  
361 **(gentamicin protection assay).** Each of AIDA externally expressing *E.coli* was added to  
362 manolayer cultured RPMI2650 cells at a cells to bacteria ration of 1:10 and the mixture was  
363 allowed to react for 3 h. The bacteria outside the cell were subjected to disinfection by GM for  
364 2 h. The bacteria inside the cell were counted with the colony count method, which was  
365 presented as CFU. Bars represent the mean  $\pm$  S.D. of intracellular bacteria as a CFU in a

366 representative experiment performed in triplicate. Asterisks indicate significant difference  
367 compared with an IgG control (Scheffe's multiple comparison test).

368

369 **Indirect immunofluorescence staining of InvX expressing *E.coli* by**  
370 **antibodies corresponding to each region of mce1A**

371 Indirect immunofluorescence was used to determine which regions of mce1A are sufficient  
372 to confer invasive ability to *E.coli*.

373 A 72-amino acid fragment of the InvX region was divided into four regions, InvXa (24 aa),  
374 InvXb (22 aa), InvXc (11 aa), and InvXd (15 aa). These peptides were subsequently synthesized  
375 as immune antigens for anti-InvX antibodies (anti-InvXa Ab, anti-InvXb Ab, anti-InvXc Ab,  
376 and anti-InvXd Ab) were studied.

377 In order to examine whether the antibodies recognize each of the regions, fluorescence  
378 immunostaining was conducted on the antibodies. The result was the following. Fluorescence  
379 microscopy revealed bacterial surface binding of the InvX antibodies by their binding of  
380 labelled secondary antibodies of fluorescence goat anti-rabbit IgG InvXa , InvXb, InvXc, and  
381 InvXd (Fig 6).

382

383 **Fig 6. Indirect immunofluorescence staining of InvX expressing *E.coli* by antibodies**  
384 **corresponding to each region of InvX.** Visualization of the bacilli reveals bacterial surface  
385 binding of the InvX antibody bound to fluorescent goat anti-rabbit IgG. (A) InvXa, (B) InvXb,  
386 (C) InvXc, (D) InvXd.

387



388 **Inhibitory effects of anti-InvX antibodies raised against each set of**  
389 **synthetic peptide corresponding to an InvX divided region on the**  
390 **nasal epithelial cells invasion of InvX expressing *E.coli***

391 In order to elucidate the role mce1A protein in association with the nasal epithelial cells  
392 invasion of *M.leprae*, we analyzed inhibitory effects of the resultant antibodies on the cell  
393 uptake of InvX-expressing *E.coli* by the inhibition assay. As shown in CFU analysis, the InvX-  
394 expressing *E. coli* pretreated with anti-InvXa Ab, anti-InvXb Ab, and anti-InvXd Ab had  
395 significantly lower entry than the IgG control, but there was no significant difference in  
396 pretreatment with anti-InvXc Ab and IgG control (Fig 7). These findings suggest that the  
397 invasion activity was most suppressed when using antibodies to cover the polypeptide chain  
398 encoded by 316 – 387 bp and expressed on the surface of *E.coli*.

399

400 **Fig 7. Inhibitory effects on anti-InvX antibodies raised against each set of synthetic**  
401 **peptide corresponding to an InvX divided region on the nasal epithelial cells invasion by**  
402 **InvX expressing *E.coli*.** pMK100 *E.coli* strain were pretreated overnight with resultant  
403 antibodies and normal IgG as a control. Each antibody preparation was added to monolayer  
404 RPMI2650 cells and incubated for 3 h. After washing, GM was added to eliminate bacteria  
405 outside the cells. Bars represent mean  $\pm$  standard deviation CFU of pMK100 *E.coli* treated with  
406 antibodies. The invasive activity was suppressed by antibodies against InvXa, InvXb, and  
407 InvXd. Asterisks indicate  $p < 0.05$ , NS: Not significant (Dunnet test). Bars represent the mean  
408  $\pm$  SD of intracellular bacteria in CFU in a representative experiment performed in triplicate.  
409 Asterisks indicate a significant difference compared with an IgG control.

410

411 **Discussion**

412 A number of studies have been conducted on the infection mode of *M.leprae*. In 1955,  
413 Khanolkar et al. reported that *M.leprae* infection of *M.leprae* occurs by normal skin contact[3].  
414 However, in 1963 Weddell et al. revealed that the infection does not occur unless the bacteria  
415 is inoculated under the skin[24]. Rees et al. induced immune suppressed mice to inhale an  
416 aerosols containing *M.leprae* which successfully infected the mice via upper airway[4].  
417 Following this, Chehl et al. revealed that transnasal infections of *M.leprae* of nude mice was  
418 possible[5]. From these studies, it became clear that the infection from aerosol containing  
419 *M.leprae* and through the nasal membrane can be established. However, as of today, only  
420 limited studies have been conducted regarding molecular mechanisms involved in the invasion.  
421 The mce region is present in tuberculosis complex such as *M.tuberculosis* and  
422 *Mycobacterium bovis*, as well as in atypical mycobacteria such as *Mycobacterium avium* and  
423 *Mycobacterium intracellulare*[25]. Chitale et al. revealed that this mce1A protein involved in  
424 the invasion into epithelial cells is expressed only in tuberculosis complex[16]. We had found  
425 that *M.leprae* has a region highly homologous with to the mce1A region of *M.tuberculosis*,  
426 and so far have prepared a recombinant protein (mce1A protein) encoded by mce1A region  
427 (ML2589; 3092446 to 3093771, 1326 bp) of *M.leprae* to investigate invasion activities to  
428 epithelial cells[15,19]. In the present study, we have confirmed that the mce1A protein was  
429 actually expressed, as a native protein, on the surface of *M.leprae*, and prepared a recombinant  
430 protein by truncating the N terminus and C terminus of mce1A region of *M.leprae* to  
431 investigate the invasion activity into the epithelial cells. As a result, it was found that invasion  
432 activity is maintained even if 105 aa (315 bp) is truncated from N terminus and 308 aa (922  
433 bp) is truncated from C terminus. Next, 316 bp to 921 bp region was divided into 3 parts, and  
434 each part was incorporated into an AIDA vector, where each region was externally expressed  
435 as a polypeptide chain to investigate whether the ability to invade can be imparted to non-  
436 pathogenic *E.coli*. These *E.coli* which externally express the protein by AIDA method were

437 examined for the invasion activity using RPMI2650 cells, where the results indicate that active  
438 sequence of *M.leprae* involved in the invasion into nasal mucosa epithelial cells is present in  
439 the 316 – 531 bp of mce1A region.

440 The most important region of mce1A protein involved in the invasion of *M.tuberculosis*  
441 into human epithelial cells is called the InvIII cell and this is located between amino acids of  
442 position 130 to position 152[26]. The InvIII region of *M.tuberculosis* corresponds to InvXb of  
443 *M.leprae*. The sequence of the regions are identical between amino acid of position 10 to  
444 position 22 counted from N terminus, except that amino acids at positions 1 to 3, 5, 8, 9, 13 are  
445 different between *M.leprae* and *M.tuberculosis*. Suppression test results also indicated that the  
446 most important region of mce1A protein of *M.leprae* involved in the invasion into human  
447 epithelial cells is different from that of *M.tuberculosis*.

448 While *M.tuberculosis* has 3,959 protein-encoding genes and only 6 pseudogenes, *M.leprae*  
449 has only 1,604 protein-encoding genes but has 1,116 pseudogenes[27], indicating that in  
450 *M.leprae*, far more proteins are inactivated as compared to *M.tuberculosis*. As in  
451 *M.tuberculosis*, the mce1A protein is expressed on the surface of bacteria as a native protein,  
452 and therefore the protein is considered as one of the most important proteins involved in the  
453 invasion of *M.leprae* into nasal mucosa epithelial cells.

## 454 **Acknowledgement**

455 We thank Ms. Noriko Nemoto for excellent technical advice, and the staff of the Kitasato  
456 University Electron Microscope Center for technical assistance.

## 457 **References**

- 458 1. WHO. Global leprosy update, 2016: accelerating reduction of disease burden. Wkly  
459 Epidemiol Rec. 2017 Sep 1; 92: 501-20.
- 460 2. Britton WJ, Lockwood DN. Leprosy. Lancet. 2004;363(9416):1209-19. Epub 2004/04/15.

- 461       doi: 10.1016/S0140-6736(04)15952-7. PubMed PMID: 15081655.
- 462    3. Noordeen, SK. The epidemiology of leprosy. 2<sup>nd</sup> ed. Edinburgh: Churchill-livingstone; 1994.  
463       pp. 29-48.
- 464    4. Rees RJ, McDougall AC. Airborne infection with *Mycobacterium leprae* in mice. J Med  
465       Microbiol. 1977;10(1):63-8. Epub 1977/02/01. doi: 10.1099/00222615-10-1-63. PubMed  
466       PMID: 320339.
- 467    5. Chehl S, Job CK, Hastings RC. Transmission of leprosy in nude mice. Am J Trop Med Hyg.  
468       1985;34(6):1161-6. Epub 1985/11/01. PubMed PMID: 3914846.
- 469    6. McDougall AC, Rees RJ, Weddell AG, Kanan MW. The histopathology of lepromatous  
470       leprosy in the nose. J Pathol. 1975;115(4):215-26. Epub 1975/04/01. doi:  
471       10.1002/path.1711150406. PubMed PMID: 1099180.
- 472    7. Job CK, Jayakumar J, Kearney M, Gillis TP. Transmission of leprosy: a study of skin and  
473       nasal secretions of household contacts of leprosy patients using PCR. Am J Trop Med  
474       Hyg. 2008;78(3):518-21. Epub 2008/03/14. PubMed PMID: 18337353.
- 475    8. Suneetha S, Arunthathi S, Job A, Date A, Kurian N, Chacko CJ. Histological studies in  
476       primary neuritic leprosy: changes in the nasal mucosa. Lepr Rev. 1998;69(4):358-66. Epub  
477       1999/02/03. PubMed PMID: 9927808.
- 478    9. Patrocinio LG, Goulart IM, Goulart LR, Patrocinio JA, Ferreira FR, Fleury RN. Detection  
479       of *Mycobacterium leprae* in nasal mucosa biopsies by the polymerase chain reaction.  
480       FEMS Immunol Med Microbiol. 2005;44(3):311-6. Epub 2005/05/24. doi:  
481       10.1016/j.femsim.2005.01.002. PubMed PMID: 15907454.
- 482    10. Klatser PR, van Beers S, Madjid B, Day R, de Wit MY. Detection of *Mycobacterium leprae*  
483       nasal carriers in populations for which leprosy is endemic. J Clin Microbiol.  
484       1993;31(11):2947-51. Epub 1993/11/01. PubMed PMID: 8263180; PubMed Central  
485       PMCID: PMCPMC266167.

- 486 11. Rambukkana A, Salzer JL, Yurchenco PD, Tuomanen EI. Neural targeting of  
487 *Mycobacterium leprae* mediated by the G domain of the laminin- $\alpha$ 2 chain. *Cell*.  
488 1997;88(6):811-21. Epub 1997/03/21. PubMed PMID: 9118224.
- 489 12. Rambukkana A, Yamada H, Zanazzi G, Mathus T, Salzer JL, Yurchenco PD, et al. Role of  
490  $\alpha$ -dystroglycan as a Schwann cell receptor for *Mycobacterium leprae*. *Science*.  
491 1998;282(5396):2076-9. Epub 1998/12/16. PubMed PMID: 9851927.
- 492 13. Shimoji Y, Ng V, Matsumura K, Fischetti VA, Rambukkana A. A 21-kDa surface protein  
493 of *Mycobacterium leprae* binds peripheral nerve laminin-2 and mediates Schwann cell  
494 invasion. *Proc Natl Acad Sci U S A*. 1999;96(17):9857-62. Epub 1999/08/18. PubMed  
495 PMID: 10449784; PubMed Central PMCID: PMCPMC22300.
- 496 14. Ng V, Zanazzi G, Timpl R, Talts JF, Salzer JL, Brennan PJ, et al. Role of the cell wall  
497 phenolic glycolipid-1 in the peripheral nerve predilection of *Mycobacterium leprae*. *Cell*.  
498 2000;103(3):511-24. Epub 2000/11/18. PubMed PMID: 11081637.
- 499 15. Arruda S, Bomfim G, Knights R, Huima-Byron T, Riley LW. Cloning of an *M. tuberculosis*  
500 DNA fragment associated with entry and survival inside cells. *Science*.  
501 1993;261(5127):1454-7. Epub 1993/09/10. PubMed PMID: 8367727.
- 502 16. Chitale S, Ehrt S, Kawamura I, Fujimura T, Shimono N, Anand N, et al. Recombinant  
503 *Mycobacterium tuberculosis* protein associated with mammalian cell entry. *Cell Microbiol*.  
504 2001;3(4):247-54. Epub 2001/04/12. PubMed PMID: 11298648.
- 505 17. Casali N, Konieczny M, Schmidt MA, Riley LW. Invasion activity of a *Mycobacterium*  
506 *tuberculosis* peptide presented by the *Escherichia coli* AIDA autotransporter. *Infect*  
507 *Immun*. 2002;70(12):6846-52. Epub 2002/11/20. PubMed PMID: 12438361; PubMed  
508 Central PMCID: PMCPMC133103.
- 509 18. Fujimura T, Lu S, Ehrt S, Shimono N, Riley LW. Examination of anti-mcep monoclonal  
510 antibodies in their inhibitory effect on mammalian cell association. In the US-Japan

- 511 cooperative medical science program. 34<sup>th</sup> Tuberculosis-Leprosy research conference. San  
512 Francisco: California.1999 Jun 27-30. pp. 271.
- 513 19. Sato N, Fujimura T, Masuzawa M, Yogi Y, Matsuoka M, Kanoh M, et al. Recombinant  
514 *Mycobacterium leprae* protein associated with entry into mammalian cells of respiratory  
515 and skin components. J Dermatol Sci. 2007;46(2):101-10. Epub 2007/02/24. doi:  
516 10.1016/j.jdermsci.2007.01.006. PubMed PMID: 17317107.
- 517 20. Maeda S, Matsuoka M, Nakata N, Kai M, Maeda Y, Hashimoto K, et al. Multidrug resistant  
518 *Mycobacterium leprae* from patients with leprosy. Antimicrob Agents Chemother.  
519 2001;45(12):3635-9. Epub 2001/11/16. doi: 10.1128/AAC.45.12.3635-3639.2001.  
520 PubMed PMID: 11709358; PubMed Central PMCID: PMC90887.
- 521 21. Matsuoka M. The history of *Mycobacterium leprae* Thai-53 strain. Lepr Rev.  
522 2010;81(2):137. Epub 2010/09/10. PubMed PMID: 20825118.
- 523 22. Benz I, Schmidt MA. Cloning and expression of an adhesin (AIDA-I) involved in diffuse  
524 adherence of enteropathogenic *Escherichia coli*. Infect Immun. 1989;57(5):1506-11. Epub  
525 1989/05/01. PubMed PMID: 2565291; PubMed Central PMCID: PMC313306.
- 526 23. Elsinghorst EA. Measurement of invasion by gentamicin resistance. Methods Enzymol.  
527 1994;236:405-20. Epub 1994/01/01. PubMed PMID: 7968625.
- 528 24. Weddell G, Palmer E, Rees RJW, Jamison DC. Experimental observations related to the  
529 histopathology of leprosy. In the pathogenesis of Leprosy. Ciba Foundations Study  
530 Group No 15 (eds). London: Churchill. 1963. pp. 3-15.
- 531 25. Parker SL, Tsai YL, Palmer CJ. Comparison of PCR-generated fragments of the mce gene  
532 from *Mycobacterium tuberculosis*, *M. avium*, *M. intracellulare*, and *M. scrofulaceum*. Clin  
533 Diagn Lab Immunol. 1995;2(6):770-5. Epub 1995/11/01. PubMed PMID: 8574846;  
534 PubMed Central PMCID: PMC170237.
- 535 26. Kohwiwattanagun J, Kawamura I, Fujimura T, Mitsuyama M. Mycobacterial mammalian

536 cell entry protein 1A (Mce1A)-mediated adherence enhances the chemokine production  
537 by A549 alveolar epithelial cells. *Microbiol Immunol.* 2007;51(2):253-61. Epub  
538 2007/02/21. PubMed PMID: 17310094.

539 27. Cole ST, Eglmeier K, Parkhill J, James KD, Thomson NR, Wheeler PR, et al. Massive  
540 gene decay in the leprosy bacillus. *Nature.* 2001;409(6823):1007-11. Epub 2001/03/10.  
541 doi: 10.1038/35059006. PubMed PMID: 11234002.

542

543

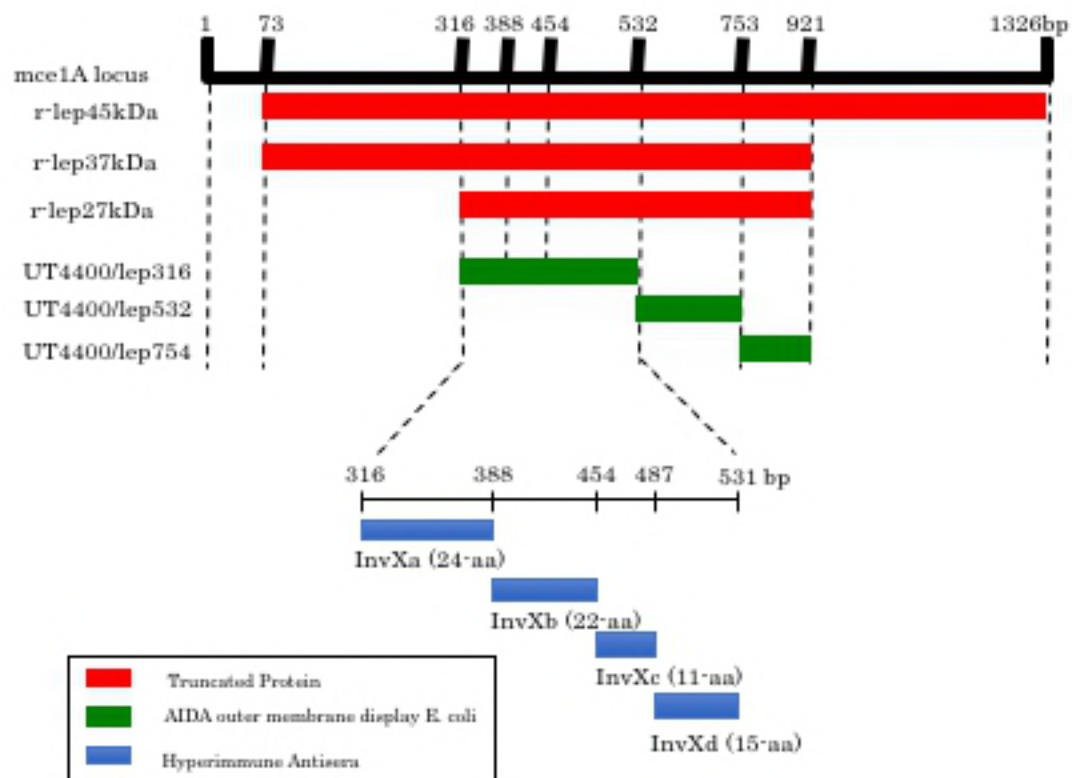



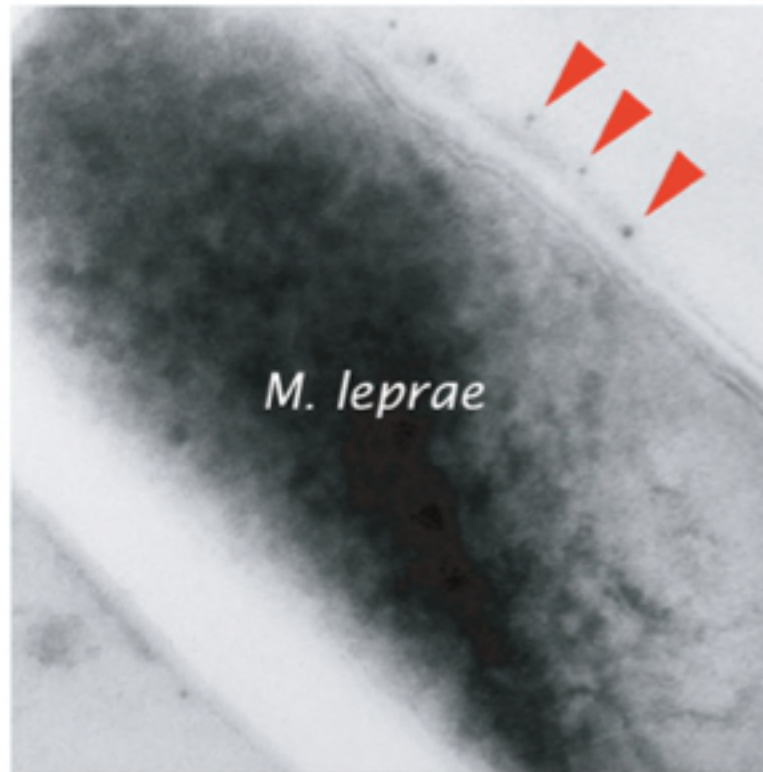

A

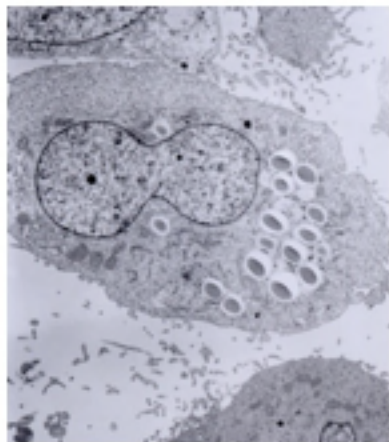

B

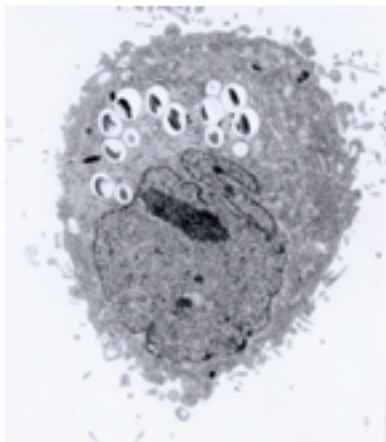

C

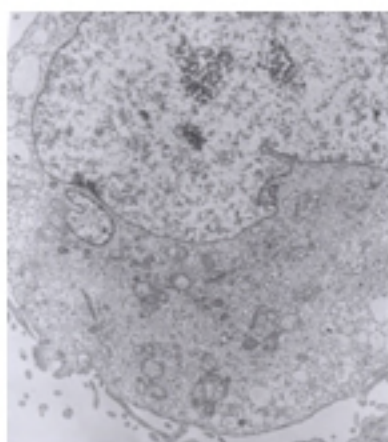

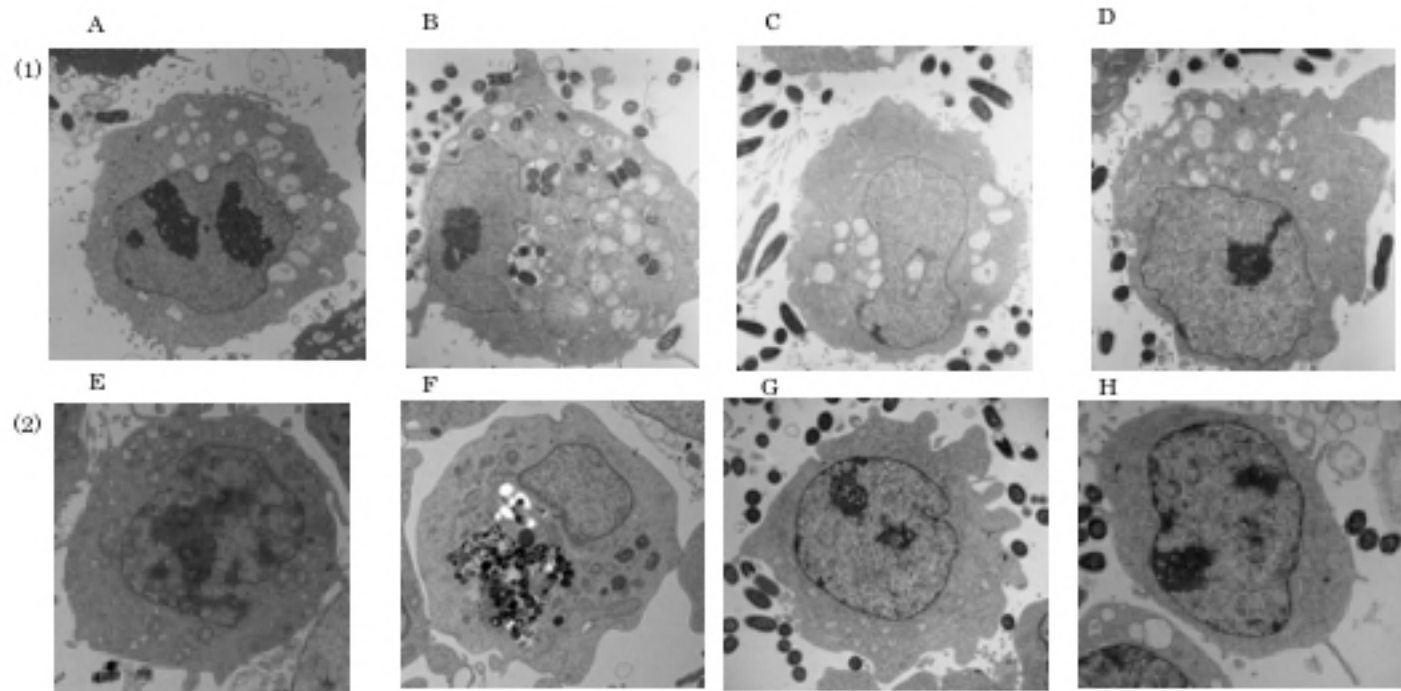

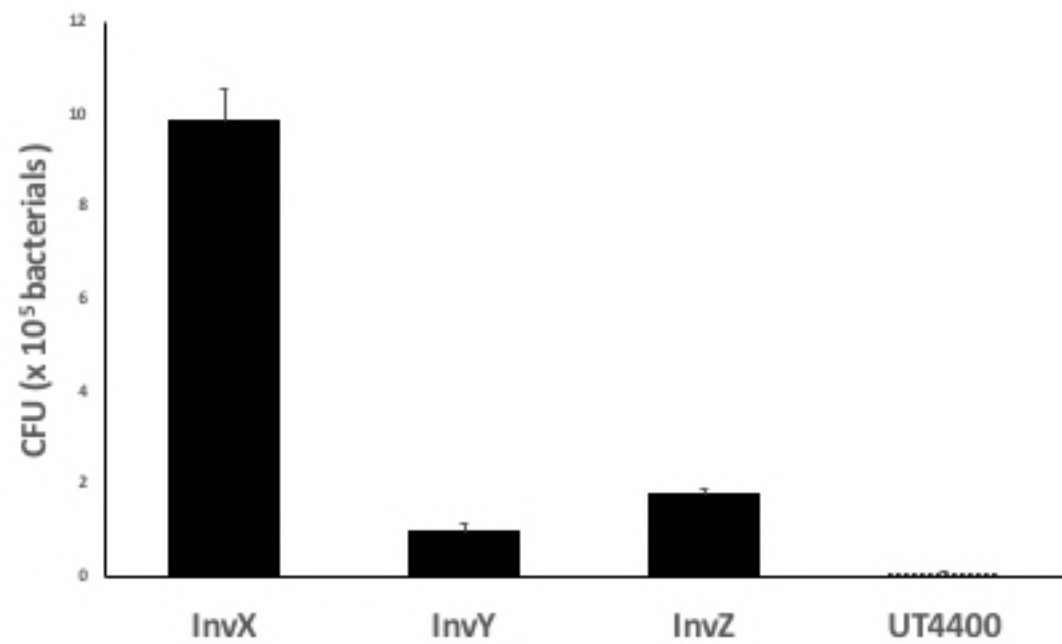

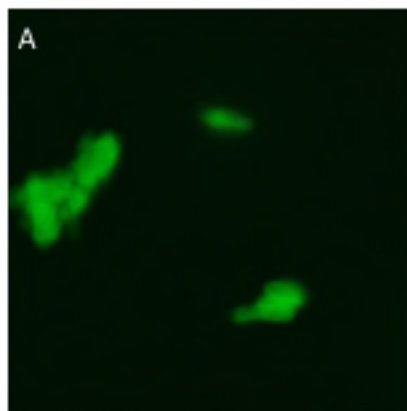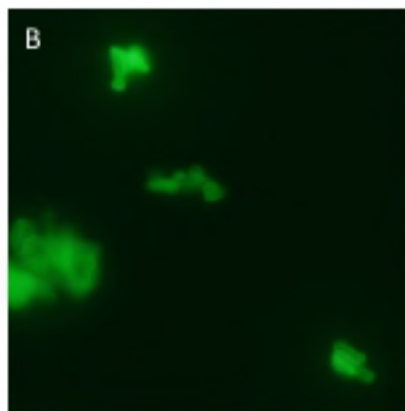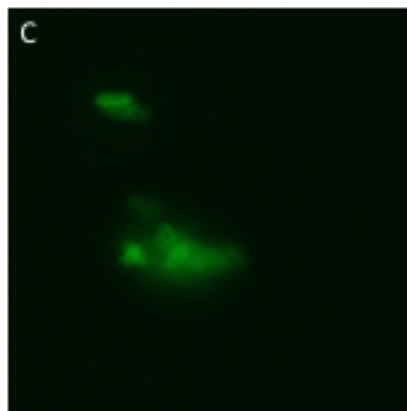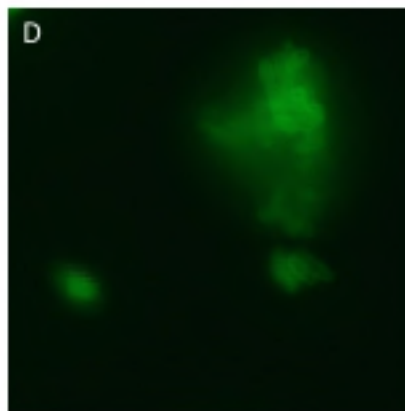

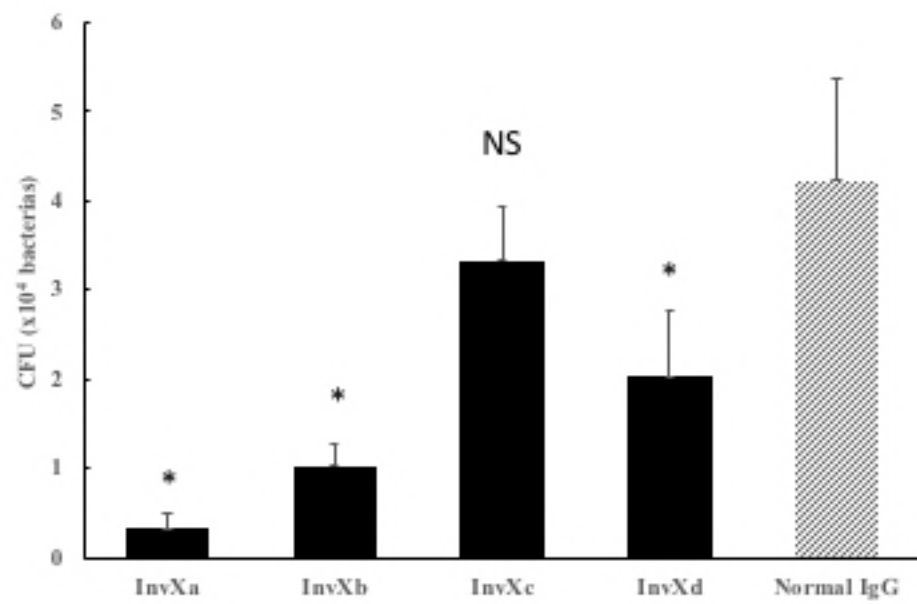

Source: http://biorxiv.org/content/10.1101/373324v1.full.pdf
